# Supplementary material for: Field Dissipation, Dietary Risk Assessment, and Soil Fate of Chlorantraniliprole and Abamectin (Dual-Active Formulation) in Watermelon under Field Conditions
Source: Research Square preprint supplement (doi:10.21203/rs.3.rs-8500769/v1), 2026-02-11
Supplement: Supplementary file 1 [file e536f47d4b3f64091d4ba108.docx]

**Table S1. Meteorological data collected during the course of study (2023)**

| **SMW** | **Date** | **Temperature (oC)** | | **Relative Humidity (%)** | | **Rainfall**  **(mm)** |
| --- | --- | --- | --- | --- | --- | --- |
| **Max** | **Min** | **R-I** | **R-II** |
| 1 | 1.1.23 to 7.1.23 | 28.1 | 15.1 | 82.9 | 48.0 | 0.0 |
| 2 | 8.1.23 to 14.1.23 | 28.3 | 13.5 | 84.5 | 37.5 | 0.0 |
| 3 | 15.1.23 to 21.1.23 | 28.9 | 13.5 | 84.0 | 35.1 | 0.0 |
| 4 | 22.1.23 to 28.1.23 | 29.0 | 13.9 | 82.7 | 36.1 | 0.0 |
| 5 | 29.1.23 to 4.2.23 | 29.0 | 14.2 | 82.1 | 36.5 | 0.0 |
| 6 | 2.2.23 to 11.02.23 | 29.2 | 14.3 | 81.2 | 34.8 | 0.0 |
| 7 | 12.2.23 to 18.2.23 | 29.5 | 14.3 | 79.8 | 33.2 | 0.0 |
| 8 | 19.2.23 to 25.2.23 | 29.9 | 14.4 | 78.9 | 31.6 | 0.0 |
| 9 | 26.2.23 to 4.3.2023 | 30.3 | 14.6 | 78.0 | 30.4 | 0.0 |
| 10 | 5.3.23 to 11.3.2023 | 30.4 | 14.9 | 78.2 | 30.4 | 0.2 |
| 11 | 12.3.23 to 18.3.2023 | 30.4 | 15.2 | 78.2 | 31.0 | 0.2 |
| 12 | 19.3.23 to 25.3.2023 | 30.4 | 15.3 | 78.7 | 30.7 | 0.3 |
| 13 | 26.3.23 to 1.4.2023 | 30.6 | 15.6 | 77.9 | 30.3 | 0.2 |
| 14 | 2.4.2023 to 8.4.2023 | 30.9 | 16.0 | 77.2 | 30.2 | 0.5 |
| 15 | 9.4.2023 to 15.4.2023 | 31.2 | 16.4 | 76.8 | 30.1 | 0.6 |
| 16 | 16.4.2023 to 22.4.2023 | 36.5 | 22.9 | 82 | 32.0 | 0.0 |
| 17 | 23.4.2023 to 29.4.2023 | 37.4 | 23.7 | 84 | 35.0 | 0.0 |

*SMW: Standard Meteorological week

**Table S2:** Comprehensive Dietary Risk Assessment for Chlorantraniliprole and Abamectin Residues in Watermelon Following Application of Dual-Active Formulation

| **Risk Assessment Parameter** | **Unit** | **Chlorantraniliprole (4.3% SC)** | **Abamectin (1.7% SC)** |
| --- | --- | --- | --- |
| Toxicological Data |  |  |  |
| Acceptable Daily Intake (ADI) | mg/kg bw | 2.0(a) | 0.001(b) |
| Acute Reference Dose (ARfD) | mg/kg bw | 0.3 | 0.001 |
| Source of toxicological data | - | FAO/WHO JMPR 2008 | FAO/WHO JMPR 2005 |
| Safety factor incorporated | - | 100-1000x | 100-1000x |
|  |  |  |  |
| Consumption & Exposure Parameters |  |  |  |
| Watermelon consumption rate | g/day | 60(c) | 60(c) |
| Average adult body weight | kg | 60(d) | 60(d) |
| Geographic coverage | - | Urban & Rural India | Urban & Rural India |
| Maximum Permissible Intake (MPI) | mg/day | 120 | 0.06 |
|  |  |  |  |
| Field Residue Data |  |  |  |
| Initial deposit (Day 0) | mg/kg | 0.241 | 0.125 |
| Half-life (DT₅₀) | days | 3.79 | 6.7 |
| Residue at Day 7 | mg/kg | 0.018 | 0.031 |
| Residue at Day 10 | mg/kg | <0.03 (LOQ) | <0.05 (LOQ) |
| Rate of decline | %/day | 24.6 | 14.9 |
|  |  |  |  |
| Theoretical Maximum Daily Intake (TMDI) |  |  |  |
| TMDI at Day 0 (worst-case) | mg/day | 0.241 | 0.125 |
| TMDI at Day 7 (realistic harvest) | mg/day | 0.018 | 0.031 |
| TMDI at Day 10 (end of PHI) | mg/day | <0.003 | <0.005 |
| Percentage of MPI - Day 0 | % | 0.2 | 208 |
| Percentage of MPI - Day 7 | % | 0.015 | 52 |
| Percentage of MPI - Day 10 | % | <0.003 | <8 |
|  |  |  |  |
| Hazard Quotient (HQ) Analysis |  |  |  |
| HQ at Day 0 | - | 0.002 | 2.08 |
| HQ at Day 7 | - | <0.0002 | 0.52 |
| HQ at Day 10 | - | <0.00003 | <0.08 |
| Safety threshold (HQ ≤ 1.0) | - | ✓Met at all times | Met at Day 7-10 |
|  |  |  |  |
| Risk Classification & Recommendation |  |  |  |
| Screening-level risk (Day 0) | - | Negligible | Theoretical concern |
| Risk with 7-day PHI | - | Safe | Safe |
| Risk with 10-day PHI | - | Safe | Safe |
| Recommended action | - | Approval recommended | 7-10-day PHI required |

(a) FAO/WHO JMPR (2008); Codex Alimentarius (2010); (b) FAO/WHO JMPR (2005); Codex Alimentarius (2005); (c) Based on national consumption data: NSSO (2014), ICMR recommendations (Hemalatha et al., 2020), household surveys (Choudhury et al., 2020); (d) Median body weight for Indian adult population (Hemalatha et al., 2020)
